# Supplementary material
Source: publisher site journal article supplement (https://www.spandidos-publications.com/5959/downloadSupplementary)
Supplement: Supplementary file 1 [file downloadSupplementary]

**Table SI.** The expression status of FABP5 and related proteins in prostate cells [the expression levels of FABP5, its related proteins (PPAR $\gamma$ 1, PPAR $\gamma$ 2, p-PPAR $\gamma$ 1, p-PPAR $\gamma$ 2), AR, ARV7 and VEGF in different cell types are summarized].

| Cell type | Expression level |                  |                  |                   |                   |              |              |        |
|-----------|------------------|------------------|------------------|-------------------|-------------------|--------------|--------------|--------|
|           | FABP5            | PPAR $\gamma$ 1  | PPAR $\gamma$ 2  | p-PPAR $\gamma$ 1 | p-PPAR $\gamma$ 2 | AR           | ARV7         | VEGF   |
| PNT2      | Not detected     | Strong           | Strong           | Not detected      | Not detected      | Not detected | Not detected | Lower  |
| 22RV1     | Moderate         | Moderate         | Moderate         | Moderate          | Moderate          | Present      | Present      | Higher |
| DU145     | Very high        | Slightly reduced | Slightly reduced | Very high         | Very high         | Not detected | Not detected | Higher |
| PC3M      | Very high        | Slightly reduced | Slightly reduced | Very high         | Very high         | Not detected | Not detected | Higher |

FABP5, fatty acid-binding protein 5; pPPAR $\gamma$ , phosphorylated peroxisome proliferator-activated receptor- $\gamma$ ; AR, androgen receptor; ARV7, AR splicing variant 7.

**Table SII.** Summary of protein effects on prostate cancer cell lines after FABP5- or AR- knockout [the effect of FABP5- or AR- knockout, its related proteins (PPAR $\gamma$ 1, PPAR $\gamma$ 2, p-PPAR $\gamma$ 1, p-PPAR $\gamma$ 2), AR, ARV7 and VEGF in different cell types are summarized].

| Cell Line            | Protein           | Effect               |
|----------------------|-------------------|----------------------|
| 22RV1-FABP5-KO cells | ARFL              | No change            |
|                      | ARV7              | Not detectable       |
|                      | PPAR $\gamma$ -1  | Increased by 75%     |
|                      | PPAR $\gamma$ -2  | Decreased by 68%     |
|                      | p-PPAR $\gamma$ 1 | Decreased by 64%     |
|                      | p-PPAR $\gamma$ 2 | Decreased by 88%     |
|                      | VEGF              | Reduced by 90%       |
| 22RV1-AR-KO cells    | FABP5             | Not detectable       |
|                      | PPAR $\gamma$ -1  | Reduced by 86%       |
|                      | PPAR $\gamma$ -2  | Reduced by 100%      |
|                      | p-PPAR $\gamma$ 1 | Decreased by 100%    |
|                      | p-PPAR $\gamma$ 2 | Decreased by 93%     |
|                      | VEGF              | Reduced by 95%       |
| Du145-FABP5-KO cells | PPAR $\gamma$ -1  | Completely inhibited |
|                      | PPAR $\gamma$ -2  | Completely inhibited |
|                      | p-PPAR $\gamma$ 1 | Reduced by 85%       |
|                      | p-PPAR $\gamma$ 2 | Reduced by 100%      |
|                      | VEGF              | Reduced by 90%       |
| PC3M-FABP5-KO Cells  | PPAR $\gamma$ -1  | Reduced by 97.8%     |
|                      | PPAR $\gamma$ -2  | Reduced by 100%      |
|                      | p-PPAR $\gamma$ 1 | Decreased by 50%     |

|  |                   |                  |
|--|-------------------|------------------|
|  | p-PPAR $\gamma$ 2 | Decreased by 43% |
|  | VEGF              | Reduced by 58%   |

FABP5, fatty acid-binding protein 5; pPPAR $\gamma$ , phosphorylated peroxisome proliferator-activated receptor- $\gamma$ ; ARV7, AR splicing variant 7; KO, knockout.

**Table SIII.** The top 40 differentially expressed genes between 22RV1 and 22RV1-FABP5-KO cells.

| Gene ID         | Gene name | log2Fold change | P-value                |
|-----------------|-----------|-----------------|------------------------|
| ENSG00000171345 | KRT19     | -4.76503        | 1.95x10 <sup>-9</sup>  |
| ENSG00000164647 | STEAP1    | -4.58614        | 9.77x10 <sup>-11</sup> |
| ENSG00000004776 | HSPB6     | -4.52465        | 8.59x10 <sup>-11</sup> |
| ENSG00000130164 | LDLR      | -4.05123        | 6.01x10 <sup>-12</sup> |
| ENSG00000196189 | SEMA4A    | -5.77535        | 3.73x10 <sup>-17</sup> |
| ENSG00000115648 | MLPH      | -6.85049        | 2.48x10 <sup>-36</sup> |
| ENSG00000166888 | STAT6     | -7.03778        | 4.68x10 <sup>-26</sup> |
| ENSG00000166840 | GLYATL1   | -9.07851        | 4.27x10 <sup>-9</sup>  |
| ENSG00000127324 | TSPAN8    | -5.19101        | 1.83x10 <sup>-10</sup> |
| ENSG00000019991 | HGF       | -6.59939        | 1.83x10 <sup>-8</sup>  |
| ENSG00000162458 | FBLIM1    | -5.75828        | 5.97x10 <sup>-8</sup>  |
| ENSG00000196620 | UGT2B15   | -8.72938        | 2.40x10 <sup>-8</sup>  |
| ENSG00000079112 | CDH17     | -7.72931        | 1.88x10 <sup>-6</sup>  |
| ENSG00000196139 | AKR1C3    | -7.91328        | 6.99x10 <sup>-7</sup>  |
| ENSG00000173702 | MUC13     | -7.62374        | 2.46x10 <sup>-6</sup>  |
| ENSG00000007038 | PRSS21    | -7.43399        | 5.13x10 <sup>-6</sup>  |
| ENSG00000163631 | ALB       | -4.91839        | 2.25x10 <sup>-6</sup>  |

|                 |         |          |                        |
|-----------------|---------|----------|------------------------|
| ENSG00000006210 | CX3CL1  | -7.3886  | 6.02x10 <sup>-6</sup>  |
| ENSG00000137648 | TMPRSS4 | -6.58036 | 0.00013                |
| ENSG00000012504 | NR1H4   | -6.21572 | 0.000518               |
| ENSG00000104332 | SFRP1   | 7.918877 | 1.48x10 <sup>-6</sup>  |
| ENSG00000090932 | DLL3    | 7.051427 | 5.35x10 <sup>-10</sup> |
| ENSG00000119715 | ESRRB   | 8.843079 | 1.52x10 <sup>-7</sup>  |
| ENSG00000135074 | ADAM19  | 8.656002 | 3.69x10 <sup>-7</sup>  |
| ENSG00000113430 | IRX4    | 9.309391 | 1.13x10 <sup>-8</sup>  |
| ENSG00000187498 | COL4A1  | 9.357618 | 8.34x10 <sup>-9</sup>  |
| ENSG00000119698 | PPP4R4  | 9.965597 | 4.78x10 <sup>-10</sup> |
| ENSG00000043039 | BARX2   | 9.926337 | 4.91x10 <sup>-10</sup> |
| ENSG00000131620 | ANO1    | 6.833901 | 1.86x10 <sup>-10</sup> |
| ENSG00000277586 | NEFL    | 7.651159 | 1.82x10 <sup>-16</sup> |
| ENSG00000181031 | RPH3AL  | 7.112501 | 9.85x10 <sup>-12</sup> |
| ENSG00000082397 | EPB41L3 | 6.417703 | 2.01x10 <sup>-14</sup> |
| ENSG00000173320 | STOX2   | 9.442916 | 6.22x10 <sup>-10</sup> |
| ENSG00000272636 | DOC2B   | 9.415629 | 5.40x10 <sup>-10</sup> |
| ENSG00000101680 | LAMA1   | 8.007561 | 6.76x10 <sup>-21</sup> |
| ENSG00000120833 | SOCS2   | 7.073519 | 4.57x10 <sup>-22</sup> |

|                 |        |          |                        |
|-----------------|--------|----------|------------------------|
| ENSG00000079112 | CDH17  | -7.72931 | $1.88 \times 10^{-6}$  |
| ENSG00000111249 | CUX2   | 8.552648 | $2.88 \times 10^{-38}$ |
| ENSG00000142173 | COL6A2 | 6.638127 | $1.48 \times 10^{-31}$ |
| ENSG00000130707 | ASS1   | 8.848459 | $2.58 \times 10^{-78}$ |

FABP5, fatty acid-binding protein 5; KO, knockout.

**Table SIV.** The top 30 Gene Ontology enriched pathways connected with the differentially expressed genes between 22RV1 and 22RV1-FABP5-KO cells.

| <b>Enrichment FDR</b>  | <b>Fold enrichment</b> | <b>Pathway</b>                                   |
|------------------------|------------------------|--------------------------------------------------|
| 3.95x10 <sup>-10</sup> | 20.85289               | Response to fatty acid                           |
| 4.10x10 <sup>-8</sup>  | 25.27623               | Cellular response to fatty acid                  |
| 4.05x10 <sup>-5</sup>  | 92.41622               | Response to jasmonic acid                        |
| 4.05x10 <sup>-5</sup>  | 92.41622               | Cellular response to jasmonic acid stimulus      |
| 4.05x10 <sup>-5</sup>  | 92.41622               | Response to prostaglandin D                      |
| 4.05x10 <sup>-5</sup>  | 92.41622               | Cellular response to prostaglandin D stimulus    |
| 1.68x10 <sup>-7</sup>  | 13.39365               | Odontogenesis of dentin-containing tooth         |
| 2.64x10 <sup>-5</sup>  | 25.67117               | Ammonium ion metabolic process.                  |
| 5.65x10 <sup>-7</sup>  | 14.03791               | Pancreas development                             |
| 2.18x10 <sup>-7</sup>  | 12.9707                | Positive regulation of neuron differentiation    |
| 0.000152               | 61.61081               | Convergent extension involved in axon elongation |
| 2.98x10 <sup>-5</sup>  | 16.80295               | Exocrine system development                      |
| 1.86x10 <sup>-6</sup>  | 12.05429               | Artery development                               |
| 2.13x10 <sup>-12</sup> | 8.143958               | Urogenital system development                    |
| 3.75x10 <sup>-8</sup>  | 9.949572               | Eye morphogenesis                                |
| 5.17x10 <sup>-9</sup>  | 9.382357               | Regulation of neuron differentiation             |
| 1.63x10 <sup>-11</sup> | 8.293763               | Renal system development                         |
| 3.90x10 <sup>-7</sup>  | 10.34685               | Camera-type eye morphogenesis                    |
| 6.22x10 <sup>-9</sup>  | 9.241622               | Multicellular organismal signaling               |
| 4.18x10 <sup>-7</sup>  | 10.26847               | Odontogenesis                                    |
| 7.71x10 <sup>-11</sup> | 8.13344                | Kidney development                               |
| 0.000167               | 27.38258               | Progesterone metabolic process                   |
| 0.000167               | 27.38258               | Paraxial mesoderm development                    |

|                        |          |                                                             |
|------------------------|----------|-------------------------------------------------------------|
| 0.000347               | 46.20811 | Paraxial mesoderm formation                                 |
| $5.81 \times 10^{-5}$  | 14.78659 | Positive regulation of epithelial to mesenchymal transition |
| $2.30 \times 10^{-5}$  | 13.06896 | Artery morphogenesis                                        |
| $9.56 \times 10^{-10}$ | 8.065415 | Heart contraction                                           |
| $9.16 \times 10^{-8}$  | 9.153606 | Response to corticosteroid                                  |
| $7.58 \times 10^{-9}$  | 8.249146 | Regulation. of heart contraction                            |
| $1.57 \times 10^{-9}$  | 7.782418 | Heart process                                               |

FABP5, fatty acid-binding protein 5; KO, knockout.

**Table SV.** The top 40 differentially expressed genes between 22RV1 and 22RV1-AR-KO cells.

| Gene ID         | Gene name | log2Fold change | P-value                |
|-----------------|-----------|-----------------|------------------------|
| ENSG00000198804 | MT-CO1    | -2.83267        | 2.10x10 <sup>-6</sup>  |
| ENSG00000198763 | MT-ND2    | -2.72373        | 1.07x10 <sup>-7</sup>  |
| ENSG00000130164 | LDLR      | -4.52892        | 5.40x10 <sup>-14</sup> |
| ENSG00000228253 | MT-ATP8   | -2.54158        | 1.35x10 <sup>-7</sup>  |
| ENSG00000198840 | MT-ND3    | -2.7471         | 4.75x10 <sup>-8</sup>  |
| ENSG00000079459 | FDFT1     | -2.36796        | 2.18x10 <sup>-6</sup>  |
| ENSG00000099194 | SCD       | -2.95305        | 5.43x10 <sup>-6</sup>  |
| ENSG00000112972 | HMGCS1    | -3.05897        | 1.14x10 <sup>-7</sup>  |
| ENSG00000169136 | ATF5      | -2.9933         | 2.13x10 <sup>-7</sup>  |
| ENSG00000210191 | MT-TL2    | -2.82356        | 6.33x10 <sup>-6</sup>  |
| ENSG00000196620 | UGT2B15   | -4.47231        | 2.16x10 <sup>-10</sup> |
| ENSG00000123201 | GUCY1B2   | -3.11183        | 1.93x10 <sup>-7</sup>  |
| ENSG00000165816 | VWA2      | -3.47047        | 7.10x10 <sup>-5</sup>  |
| ENSG00000185499 | MUC1      | -2.37316        | 0.000577               |
| ENSG00000169857 | AVEN      | -3.17426        | 7.45x10 <sup>-6</sup>  |
| ENSG00000163631 | ALB       | -3.66914        | 1.29x10 <sup>-5</sup>  |
| ENSG00000102048 | ASB9      | -3.09574        | 0.0017                 |
| ENSG00000012504 | NR1H4     | -5.83903        | 0.000323               |
| ENSG00000138115 | CYP2C8    | -5.71716        | 0.000638               |
| ENSG00000066336 | SPI1      | -4.24645        | 0.001002               |
| ENSG00000224825 | RORB-AS1  | 4.911157        | 0.00167                |
| ENSG00000109956 | B3GAT1    | 7.906402        | 7.39x10 <sup>-6</sup>  |
| ENSG00000169856 | ONECUT1   | 4.772941        | 7.69x10 <sup>-5</sup>  |

|                 |          |          |                        |
|-----------------|----------|----------|------------------------|
| ENSG00000109819 | PPARGC1A | 3.53184  | 0.00054                |
| ENSG00000185483 | ROR1     | 3.163251 | 1.35x10 <sup>-5</sup>  |
| ENSG00000164741 | DLC1     | 4.441879 | 5.59x10 <sup>-5</sup>  |
| ENSG00000058335 | ITPR1    | 4.817764 | 1.23x10 <sup>-10</sup> |
| ENSG00000111344 | RASAL1   | 2.512553 | 0.000921               |
| ENSG00000132692 | BCAN     | 4.632247 | 4.54x10 <sup>-7</sup>  |
| ENSG00000145040 | UCN2     | 3.26252  | 5.12x10 <sup>-6</sup>  |
| ENSG00000130707 | ASS1     | 2.624126 | 0.000342               |
| ENSG00000206503 | HLA-A    | 4.722258 | 3.18x10 <sup>-9</sup>  |
| ENSG00000186526 | CYP4F8   | 4.63578  | 6.29x10 <sup>-10</sup> |
| ENSG00000180447 | GAS1     | 10.8462  | 2.58x10 <sup>-12</sup> |
| ENSG00000105696 | TMEM59L  | 4.920548 | 1.18x10 <sup>-13</sup> |
| ENSG00000198963 | RORB     | 3.151807 | 1.03x10 <sup>-5</sup>  |
| ENSG00000087258 | GNAO1    | 3.95591  | 7.50x10 <sup>-10</sup> |
| ENSG00000074211 | PPP2R2C  | 2.778014 | 9.65x10 <sup>-5</sup>  |
| ENSG00000100292 | HMOX1    | 7.007461 | 6.12x10 <sup>-5</sup>  |
| ENSG00000100346 | CACNAII  | 4.142474 | 8.39x10 <sup>-10</sup> |

AR, androgen receptor; KO, knockout.

**Table SVI.** The top 30 Gene Ontology enriched pathways connected with the differentially expressed genes between DU145 and DU145-FABP5-KO cells.

| <b>Enrichment FDR</b> | <b>Fold enrichment</b> | <b>Pathway</b>                                                                             |
|-----------------------|------------------------|--------------------------------------------------------------------------------------------|
| 1.15x10 <sup>-6</sup> | 11.44033               | Positive regulation of lipid transport                                                     |
| 3.12x10 <sup>-6</sup> | 12.06138               | Antibacterial humoral response                                                             |
| 1.18x10 <sup>-6</sup> | 9.735073               | Positive regulation of lipid localization                                                  |
| 0.00053               | 22.07311               | Interleukin-27-mediated signaling pathway                                                  |
| 4.16x10 <sup>-6</sup> | 8.389575               | Type I interferon signaling pathway                                                        |
| 4.42x10 <sup>-6</sup> | 8.321917               | Cellular response to type I interferon                                                     |
| 0.000763              | 19.74962               | Positive regulation of eicosanoid secretion                                                |
| 0.00021               | 12.23618               | Positive regulation of anion transport                                                     |
| 5.46x10 <sup>-5</sup> | 9.62161                | Cellular response to virus                                                                 |
| 0.000109              | 10.59153               | Negative regulation of viral genome replication                                            |
| 8.22x10 <sup>-5</sup> | 9.041995               | Peripheral nervous system development                                                      |
| 0.001184              | 17.05649               | Thyroid hormone generation                                                                 |
| 0.000769              | 12.67712               | Positive regulation of insulin secretion involved in cellular response to glucose stimulus |
| 0.001346              | 16.3149                | Regulation of eicosanoid secretion                                                         |
| 0.001346              | 16.3149                | Positive regulation of fatty acid transport                                                |
| 8.44x10 <sup>-6</sup> | 6.864198               | Interferon-gamma-mediated signaling pathway                                                |
| 1.20x10 <sup>-5</sup> | 6.621932               | Regulation of lipid localization                                                           |
| 0.001512              | 15.63512               | Positive regulation of cholesterol efflux                                                  |
| 0.001512              | 15.63512               | Immunological memory process                                                               |
| 5.07x10 <sup>-5</sup> | 7.053436               | Regulation of lipid transport                                                              |
| 7.18x10 <sup>-7</sup> | 5.69565                | Positive regulation of T cell activation                                                   |
| 0.002166              | 25.58474               | Synaptic vesicle budding                                                                   |
| 5.06x10 <sup>-7</sup> | 5.500302               | Positive regulation of leukocyte cell-cell adhesion                                        |

|                       |          |                                                                                   |
|-----------------------|----------|-----------------------------------------------------------------------------------|
| 0.001199              | 11.16794 | Positive regulation of organic acid transport                                     |
| 0.002655              | 23.45267 | MDA-5 signaling pathway                                                           |
| $9.51 \times 10^{-7}$ | 5.211706 | Adaptive immune response based on somatic recombination of immune receptors built |
| 0.000911              | 8.934352 | Regulation of vasoconstriction                                                    |
| 0.001412              | 10.66031 | Response of progesterone                                                          |
| 0.000735              | 7.547987 | Positive regulation of chemokine production                                       |
| $1.18 \times 10^{-6}$ | 5.116947 | Defense response to bacterium                                                     |

FABP5, fatty acid-binding protein 5; KO, knockout.

**Table SVII.** The top 40 differentially expressed genes between Du145 and Du145-FABP5-KO cells.

| Gene ID         | Gene name  | log2Fold change | P-value                |
|-----------------|------------|-----------------|------------------------|
| ENSG00000113083 | LOX        | 2.568477        | 3.80x10 <sup>-43</sup> |
| ENSG00000205364 | MT1M       | 1.836739        | 0.011298               |
| ENSG00000244242 | IFITM10    | 2.114165        | 0.015518               |
| ENSG00000176533 | GNG7       | 2.065239        | 0.019687               |
| ENSG00000125740 | FOSB       | 3.057334        | 0.020109               |
| ENSG00000120738 | EGR1       | 1.313533        | 0.05133                |
| ENSG00000163132 | MSX1       | 2.474824        | 0.001865               |
| ENSG00000132530 | XAF1       | 5.107902        | 0.147392               |
| ENSG00000130707 | ASS1       | 1.740535        | 1.72x10 <sup>-5</sup>  |
| ENSG00000123358 | NR4A1      | 2.089559        | 0.008646               |
| ENSG00000135625 | EGR4       | 1.764551        | 0.02066                |
| ENSG00000182809 | CRIP2      | 1.553935        | 0.051683               |
| ENSG00000104081 | BMF        | 2.235654        | 2.82x10 <sup>-5</sup>  |
| ENSG00000179388 | EGR3       | 4.607518        | 0.007603               |
| ENSG00000134107 | BHLHE40    | 2.504767        | 3.84x10 <sup>-48</sup> |
| ENSG00000074181 | NOTCH3     | 2.462673        | 1.79x10 <sup>-37</sup> |
| ENSG00000165025 | SYK        | 2.018064        | 1.72x10 <sup>-7</sup>  |
| ENSG00000122877 | EGR2       | 2.442622        | 0.065936               |
| ENSG00000153093 | ACOXL      | 2.698124        | 0.006185               |
| ENSG00000162496 | DHRS3      | 2.41196         | 1.56x10 <sup>-25</sup> |
| ENSG00000105974 | CAV1       | -2.73978        | 0.010563               |
| ENSG00000232192 | KIF26B-AS1 | -1.78448        | 0.02797                |
| ENSG00000126010 | GRPR       | -4.20944        | 0.013582               |

|                 |          |          |                       |
|-----------------|----------|----------|-----------------------|
| ENSG00000115602 | IL1RL1   | -2.33115 | 0.001441              |
| ENSG00000168497 | CAVIN2   | -2.37219 | 1.29x10 <sup>-7</sup> |
| ENSG00000165124 | SVEP1    | -1.78449 | 0.041951              |
| ENSG00000185483 | ROR1     | -1.56502 | 4.73x10 <sup>-5</sup> |
| ENSG00000115365 | LANCL1   | -1.56907 | 0.04581               |
| ENSG00000185697 | MYBL1    | -1.8815  | 2.71x10 <sup>-5</sup> |
| ENSG00000165672 | PRDX3    | -1.51662 | 0.045619              |
| ENSG00000162894 | FCMR     | -2.18935 | 7.20x10 <sup>-5</sup> |
| ENSG00000144339 | TMEFF2   | -1.78211 | 0.031605              |
| ENSG00000275126 | HIST1H4L | -2.55737 | 0.090252              |
| ENSG00000151655 | ITIH2    | -2.33497 | 0.017281              |
| ENSG00000145337 | PYURF    | -2.11067 | 0.03719               |
| ENSG00000030304 | MUSK     | -1.7563  | 0.026985              |
| ENSG00000013297 | CLDN11   | -1.79274 | 0.000161              |
| ENSG00000169330 | KIAA1024 | -3.04372 | 0.001224              |

FABP5, fatty acid-binding protein 5; KO, knockout.

**Table SVIII.** The top 30 Gene Ontology enriched pathways connected with the differentially expressed genes between Du145 and Du145-FABP5-KO cells.

| <b>Enrichment FDR</b> | <b>Fold enrichment</b> | <b>Pathway</b>                                                                             |
|-----------------------|------------------------|--------------------------------------------------------------------------------------------|
| 1.15x10 <sup>-6</sup> | 11.44033               | Positive regulation of lipid transport                                                     |
| 3.12x10 <sup>-6</sup> | 12.06138               | Antibacterial humoral response                                                             |
| 1.18x10 <sup>-6</sup> | 9.735073               | Positive regulation. of lipid localization                                                 |
| 0.00053               | 22.07311               | Interleukin-27-mediated signaling pathway                                                  |
| 4.16x10 <sup>-6</sup> | 8.389575               | Type I interferon signaling pathway                                                        |
| 4.42x10 <sup>-6</sup> | 8.321917               | Cellular response to type I interferon                                                     |
| 0.000763              | 19.74962               | Positive regulation of icosanoid secretion                                                 |
| 0.00021               | 12.23618               | Positive regulation of anion transport                                                     |
| 5.46x10 <sup>-5</sup> | 9.62161                | Cellular response to virus                                                                 |
| 0.000109              | 10.59153               | Negative regulation of viral genome replication                                            |
| 8.22x10 <sup>-5</sup> | 9.041995               | Peripheral nervous system development                                                      |
| 0.001184              | 17.05649               | Thyroid hormone generation                                                                 |
| 0.000769              | 12.67712               | Positive regulation of insulin secretion involved in cellular response to glucose stimulus |
| 0.001346              | 16.3149                | Regulation of icosanoid secretion                                                          |
| 0.001346              | 16.3149                | Positive regulation of fatty acid transport                                                |
| 8.44x10 <sup>-6</sup> | 6.864198               | Interferon-gamma-mediated signaling pathway                                                |
| 1.20x10 <sup>-5</sup> | 6.621932               | Regulation of lipid localization                                                           |
| 0.001512              | 15.63512               | Positive regulation of cholesterol efflux                                                  |
| 0.001512              | 15.63512               | Immunological memory process.                                                              |
| 5.07x10 <sup>-5</sup> | 7.053436               | Regulation of lipid transport                                                              |
| 7.18x10 <sup>-7</sup> | 5.69565                | Positive regulation of T cell activation                                                   |
| 0.002166              | 25.58474               | Synaptic vesicle budding                                                                   |
| 5.06x10 <sup>-7</sup> | 5.500302               | Positive regulation of leukocyte cell-cell adhesion                                        |

|                       |          |                                                                                   |
|-----------------------|----------|-----------------------------------------------------------------------------------|
| 0.001199              | 11.16794 | Positive regulation of organic acid transport                                     |
| 0.002655              | 23.45267 | MDA-5 signaling pathway                                                           |
| $9.51 \times 10^{-7}$ | 5.211706 | Adaptive immune response based on somatic recombination of immune receptors built |
| 0.000911              | 8.934352 | Regulation of vasoconstriction                                                    |
| 0.001412              | 10.66031 | Response to progesterone                                                          |
| 0.000735              | 7.547987 | Positive regulation of chemokine production                                       |
| $1.18 \times 10^{-6}$ | 5.116947 | Defense response to bacterium                                                     |

FABP5, fatty acid-binding protein 5; KO, knockout.

**Table SIX.** Summary of top 6 DEGs: Levels of changes and biological functions in FABP5- and AR-KO cells (the effect of FABP5 or AR-KO on the DEGs and biological effects in prostate cancer cells is summarized).

| <b>DEGs in FABP5- or AR-KO Cells</b> | <b>Expression changes in FABP5-KO cells</b> | <b>Expression changes in AR-KO cells</b> | <b>Expression changes in Du145-FABP5-KO cells</b> | <b>Biological effects</b>                                 | <b>Pathways</b>                                              |
|--------------------------------------|---------------------------------------------|------------------------------------------|---------------------------------------------------|-----------------------------------------------------------|--------------------------------------------------------------|
| CRIP2                                | Upregulated by 170%                         | Upregulated by 116%                      | Upregulated                                       | Suppression of prostate cancer initiation and progression | Regulation of cellular response to type I interferon pathway |
| ERG3                                 | Upregulated by 187%                         | Upregulated by 150%                      | Upregulated by 150%                               | Suppression of prostate cancer initiation and progression | Response to progesterone signaling pathway                   |
| FOSB                                 | Upregulated by 110%                         | Upregulated by 100%                      | Upregulated by 100%                               | Suppression of prostate cancer initiation and progression | Peripheral nervous system development                        |
| GRPR                                 | Downregulated by 96%                        | Downregulated by 98%                     | Downregulated by 96%                              | Suppression of prostate cancer initiation and progression | Fatty acid and lipid transport related pathways              |
| CAV1                                 | Downregulated by 80%                        | Downregulated by 85%                     | Downregulated by 85%                              | Suppression of prostate cancer initiation and progression | Steroid and cholesterol metabolic processes                  |
| NR1H4                                | Not expressed in KO cells                   | Not expressed in KO cells                | Not expressed                                     | Suppression of prostate cancer initiation and progression | Steroid and cholesterol metabolic processes                  |

DEGs, differentially expressed genes; FABP5, fatty acid-binding protein 5; KO, knockout; AR, androgen receptor.
